# Supplementary material
Source: PubMed Central journal article supplement (PMC8630646)
Supplement: jamainternmed-e216844-s001.pdf [file jamainternmed-e216844-s001.pdf]

## Supplemental Online Content

Swaminathan L, Flanders S, Horowitz J, Zhang Q, O'Malley M, Chopra V. Safety and outcomes of midline catheters vs peripherally inserted central catheters for patients with short-term indications: a multicenter study. *JAMA Intern Med*. Published online November 29, 2021. doi:10.1001/jamainternmed.2021.6844

**eTable.** Multivariate analysis showing odds of major complications by device type

This supplemental material has been provided by the authors to give readers additional information about their work.

**eTable. Multivariate analysis showing odds of major complications by device type (limited to complications occurring within 10 days of line placement)**

|                                                                                                                                                                                                                                                                                                                                                                                                                                                                                          | <b>Total<br/>n = 10,863</b> | <b>Midline<br/>n=5,105</b> | <b>PICC<br/>n=5,758</b> | <b>Odds ratio<br/>(95% CI)</b> | <b>P value</b> |
|------------------------------------------------------------------------------------------------------------------------------------------------------------------------------------------------------------------------------------------------------------------------------------------------------------------------------------------------------------------------------------------------------------------------------------------------------------------------------------------|-----------------------------|----------------------------|-------------------------|--------------------------------|----------------|
| Any major complication                                                                                                                                                                                                                                                                                                                                                                                                                                                                   | 457 (4.2%)                  | 170 (3.3%)                 | 287 (5.0%)              | 1.45 (1.12-1.88)               | 0.005          |
| Primary BSI                                                                                                                                                                                                                                                                                                                                                                                                                                                                              | 43 (0.4%)                   | 14 (0.3%)                  | 29 (0.5%)               | 2.83 (1.37-5.84)               | 0.006          |
| Catheter Occlusion                                                                                                                                                                                                                                                                                                                                                                                                                                                                       | 295 (2.7%)                  | 92 (1.8%)                  | 203 (3.5%)              | 1.66 (1.19-2.32)               | 0.004          |
| DVT                                                                                                                                                                                                                                                                                                                                                                                                                                                                                      | 115 (1.1%)                  | 61 (1.2%)                  | 54 (0.9%)               | 0.84 (0.54-1.32)               | 0.440          |
| Pulmonary Embolism                                                                                                                                                                                                                                                                                                                                                                                                                                                                       | 13 (0.1%)                   | 7 (0.1%)                   | 6 (0.1%)                | 0.65 (0.18-2.41)               | 0.515          |
| <p>* All results are estimated using a logistic mixed-effect model with robust sandwich covariance matrix estimates to account for hospital-level correlation. Patient and device-level adjustments include age, sex, catheter lumens, line duration, Charlson comorbidity score, previous CVC placements and history of prior DVT, PE, CLABSI or Cancer.</p> <p>Abbreviations: BSI, bloodstream infection; DVT, deep vein thrombosis; PICC, peripherally inserted central catheter.</p> |                             |                            |                         |                                |                |
